# Supplementary material
Source: publisher figshare collection journal article supplement (https://asha.figshare.com/articles/dataset/_/23810838)

**Supplemental Material S3.** Descriptive statistics and age-group comparisons of self-report and behavioral measures.

**Table A.** Descriptive statistics (means and standard deviations) per age-group for all self-report and behavioral measures, and age-group difference outcomes from an independent samples *t* test. *P*-value is uncorrected.

| Self-report measure                                    | Younger adults |           | Older adults |           | <i>p</i> -value | Cohen's <i>d</i> |
|--------------------------------------------------------|----------------|-----------|--------------|-----------|-----------------|------------------|
|                                                        | <i>M</i>       | <i>SD</i> | <i>M</i>     | <i>SD</i> |                 |                  |
| Lubben Social Network Scale (LSNS-6)                   | 13.20          | 5.08      | 12.60        | 5.02      | .37             | 0.12             |
| UCLA Loneliness Scale Version 3 (UCLA LS-3)            | 43.16          | 12.61     | 39           | 11.21     | .009            | 0.35             |
| Loneliness Composite (LSNS-6 and UCLA LS-3)            | 0.11           | 0.91      | -0.12        | 0.88      | .05             | 0.26             |
| Beck Depression Inventory (BDI-I)                      | 11.22          | 7.94      | 6.49         | 4.70      | <.001           | 0.72             |
| Auditory engagement                                    | 12.31          | 8.31      | 11.48        | 7.15      | .42             | 0.11             |
| Lifestyle engagement                                   | 11.57          | 12.00     | 21.90        | 16.62     | <.001           | 0.72             |
| Speech and Spatial Qualities of Hearing Scale (SSQ-12) | 7.72           | 1.27      | 7.38         | 1.58      | .07             | 0.24             |
| Behavioral measure                                     | Younger adults |           | Older adults |           | <i>p</i> -value | Cohen's <i>d</i> |
|                                                        | <i>M</i>       | <i>SD</i> | <i>M</i>     | <i>SD</i> |                 |                  |
| Forward digit span                                     | 10.40          | 2.08      | 9.90         | 3.27      | .16             | 0.18             |
| Backward digit span                                    | 8.45           | 2.50      | 7.84         | 2.99      | .09             | 0.22             |
| Deary-Liewald choice reaction time                     | 0.48           | 0.09      | 0.97         | 0.25      | <.001           | 2.61             |
| Stroop Color-Word task interference score              | 22.76          | 1.63      | 22.28        | 7.11      | .47             | 0.09             |
| Global cognition composite                             | 0.25           | 0.37      | -0.27        | 0.71      | <.001           | 0.93             |
| Speech-in-Noise task assessing SNR-50                  | -0.70          | 2.12      | 3.12         | 4.55      | <.001           | 1.09             |

**Figure A.** Boxplot displaying the age-group difference between older and younger adults in depressive symptoms, indicated by scores on the Beck Depression Inventory (BDI-I).

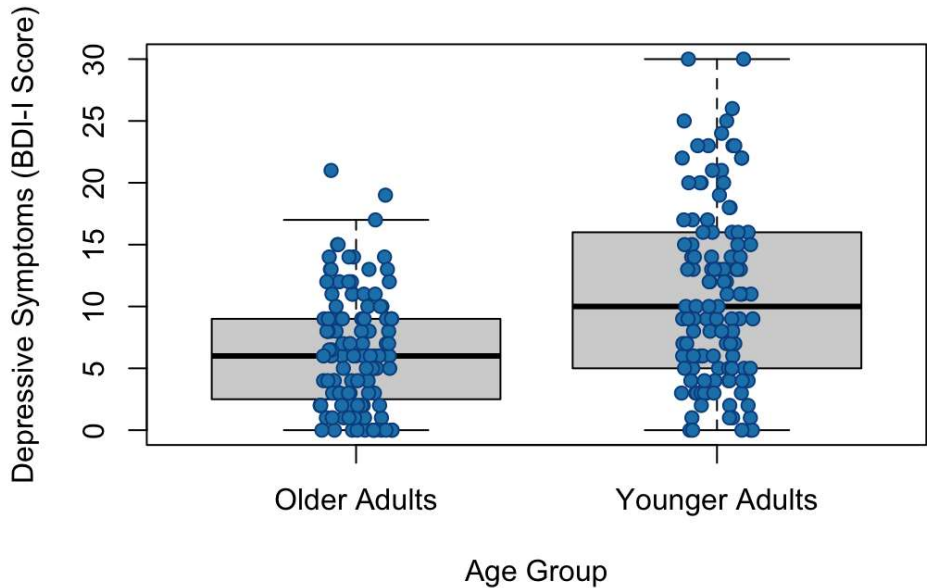

Supplement: Supplementary file 4 [file 1]
