# Supplementary material
Source: publisher figshare collection journal article supplement (https://asha.figshare.com/articles/dataset/_/23810838)
Supplement: Supplementary file 2 [file 1]

### **Supplemental Material S5. Screening questionnaire items.**

1. Do you have a clinical diagnosis of any language or speech disorders? This includes all disorders affecting language, speech, comprehension, or reading e.g. dyslexia, aphasia, stuttering, or stammering.
  - ☐ Yes
  - ☐ No
2. Do you have a clinical diagnosis of any neurological or psychiatric conditions?
  - ☐ Yes
  - ☐ No
3. Are you a native speaker of British English?
  - ☐ Yes
  - ☐ No
4. How many languages do you speak fluently (equivalent to native level)?
  - ☐ 1
  - ☐ 2-4
  - ☐ 5+
5. Do you have any hearing disorders or hearing loss, including tinnitus? Please check all boxes that apply.
  - ☐ Lifelong hearing loss
  - ☐ Age-related hearing loss
  - ☐ Tinnitus
  - ☐ Other hearing disorder, please detail \_\_\_\_\_
  - ☐ No hearing disorders
6. Do you have normal, or corrected to normal vision?
  - ☐ Yes
  - ☐ No
7. What is your handedness? (i.e., which hand do you use for most manual tasks)
  - ☐ Left-handed
  - ☐ Right-handed
  - ☐ Ambidextrous
