# Supplementary material
Source: publisher figshare collection journal article supplement (https://asha.figshare.com/articles/dataset/_/23810838)
Supplement: Supplementary file 3 [file 1]

**Supplemental Material S4.** Tables showing the results from the multiple linear regression models before outlier removal.

**Table B.** Linear multiple regression predicting subjective auditory function (SSQ-12 scores) before model outliers with Cook's distance  $>4/n$  were removed. SSQ-12 score  $\sim$  Age-group + Assigned sex + Depression + Social isolation + Auditory engagement + Lifestyle engagement.

| Predictors                                                                                                 | $\beta$ | $t$   | $p$ corrected | Cohen's $f$ |
|------------------------------------------------------------------------------------------------------------|---------|-------|---------------|-------------|
| Age-group                                                                                                  | 0.47    | 2.23  | .16           | 0.13        |
| Sex                                                                                                        | -0.34   | -1.70 | .36           | 0.13        |
| Depression                                                                                                 | -0.03   | -1.67 | .36           | 0.21        |
| Social isolation                                                                                           | -0.26   | -2.11 | .18           | 0.16        |
| Auditory engagement                                                                                        | 0.01    | 0.97  | .66           | 0.07        |
| Lifestyle engagement                                                                                       | -0.0003 | -0.05 | .96           | 0.003       |
| <i>Notes: <math>\beta</math> = unstandardized; SSQ-12 = Speech and Spatial Qualities of Hearing Scale.</i> |         |       |               |             |

**Table C.** Linear multiple regression predicting behavioral auditory function (speech-in-noise task scores) before model outliers with Cook's distance  $>4/n$  were removed. Speech-in-noise task score  $\sim$  Age-group + Assigned sex + Depression + Social isolation + Auditory engagement + Lifestyle engagement.

| Predictors                                                                                                 | $\beta$ | $t$   | $p$ corrected | Cohen's $f$ |
|------------------------------------------------------------------------------------------------------------|---------|-------|---------------|-------------|
| Age-group                                                                                                  | -4.30   | -8.10 | $< .001$      | 0.55        |
| Sex                                                                                                        | -0.06   | -0.11 | $> .99$       | 0.003       |
| Depression                                                                                                 | 0.04    | 0.91  | $> .99$       | 0.09        |
| Social isolation                                                                                           | 0.23    | 0.75  | $> .99$       | 0.02        |
| Auditory engagement                                                                                        | 0.04    | 1.32  | .94           | 0.06        |
| Lifestyle engagement                                                                                       | -0.02   | -1.10 | $> .99$       | 0.07        |
| <i>Notes: <math>\beta</math> = unstandardized; SSQ-12 = Speech and Spatial Qualities of Hearing Scale.</i> |         |       |               |             |

**Table D.** Linear multiple regression predicting global cognition before model outliers with Cook's distance  $>4/n$  were removed. Global cognition  $\sim$  Age Group + Assigned Sex + Depression + Social isolation + SSQ-12 score + Speech-in-noise task score + Auditory engagement + Lifestyle engagement.

| Predictors                                                                                                 | $\beta$ | $t$   | $p$ corrected | Cohen's $f$ |
|------------------------------------------------------------------------------------------------------------|---------|-------|---------------|-------------|
| Age-group                                                                                                  | 0.31    | 3.31  | <.001         | 0.49        |
| Sex                                                                                                        | 0.02    | 0.25  | >.99          | 0.02        |
| Depression                                                                                                 | 0.002   | 0.28  | >.99          | 0.05        |
| Social isolation                                                                                           | 0.07    | 1.47  | .71           | 0.07        |
| Auditory engagement                                                                                        | -0.0002 | -0.05 | >.99          | 0.08        |
| Lifestyle engagement                                                                                       | -0.006  | -2.18 | .18           | 0.13        |
| SSQ-12 score                                                                                               | 0.04    | 1.33  | .74           | 0.14        |
| Speech-in-noise score                                                                                      | -0.03   | -2.94 | <b>.03</b>    | 0.20        |
| <i>Notes: <math>\beta</math> = unstandardized; SSQ-12 = Speech and Spatial Qualities of Hearing Scale.</i> |         |       |               |             |
